# Supplementary material
Source: PubMed Central journal article supplement (PMC1693709)
Supplement: pnas_0609157103_6.pdf [file pnas_0609157103_6.pdf]

**Table 1. Data collection and refinement statistics of Fgfr1 minimal kinase with PLX052**

| <b>Data collection</b> |               |
|------------------------|---------------|
| Resolution, Å          | 50.0-2.4      |
| Observations, n        | 247,572       |
| Completeness, %*       | 88.05 (98.07) |
| Redundancy             | 3.5           |
| $R_{\text{sym}}$ , %*  | 8.1 (31.7)    |

  

| <b>Refinement</b> |             |
|-------------------|-------------|
| Resolution, Å     | 15.0-3.3    |
| Reflections, n    | 8,377       |
| $R$ value, %†     | 22.5 (27.7) |
| Bonds, Å          | 0.008       |
| Angles, °         | 1.6         |

\*Value in parentheses is for the highest-resolution shell.

† Value in parentheses is the free  $R$ value determined from 5% of the data.
