# Supplementary material
Source: PubMed Central journal article supplement (PMC1693709)

**A**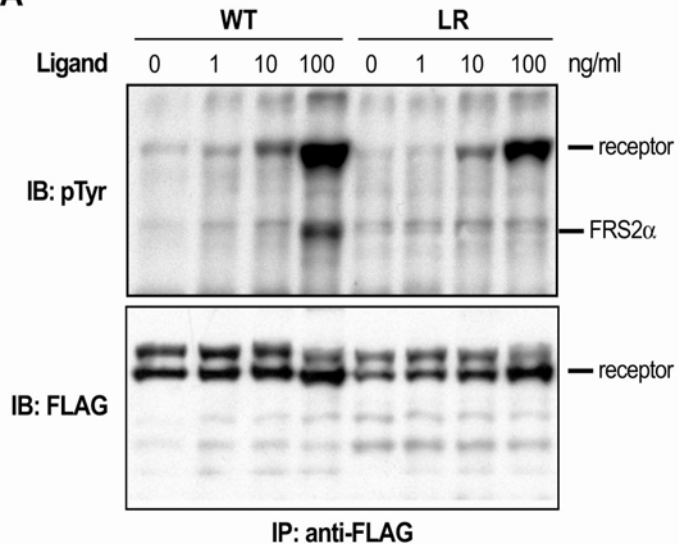**B**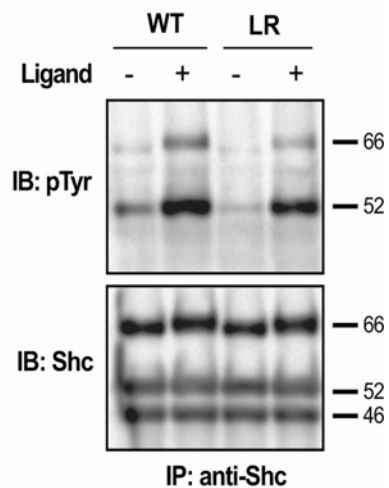

Supplement: pnas_0609157103_1.pdf [file pnas_0609157103_1.pdf]

**WT*****Fgfr2*<sup>C342Y/+</sup>*****Fgfr2*<sup>CLR/+</sup>****A**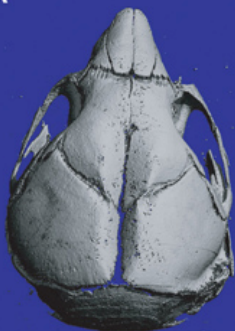

2.0 mm

**B**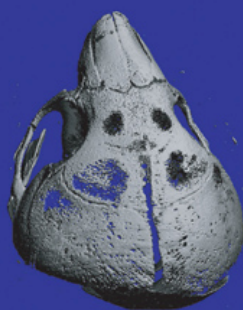

2.0 mm

**C**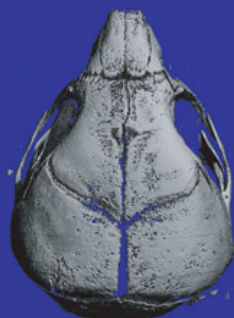

2.0 mm

**D**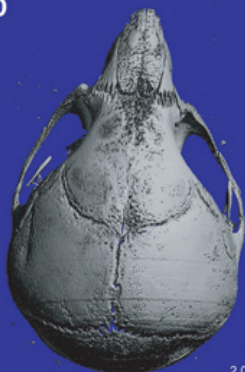

2.0 mm

**E**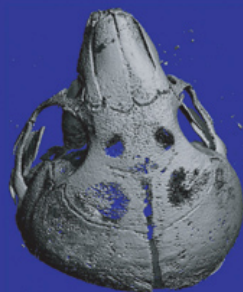

2.0 mm

**F**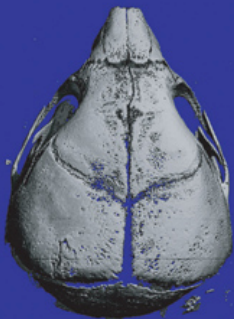

2.0 mm

**G**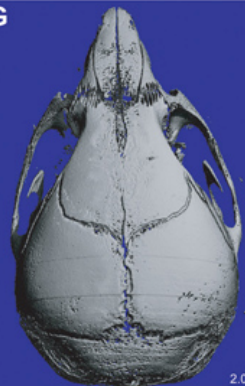

2.0 mm

**H**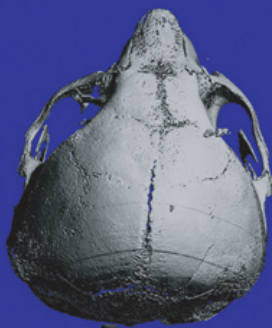

2.0 mm

**I**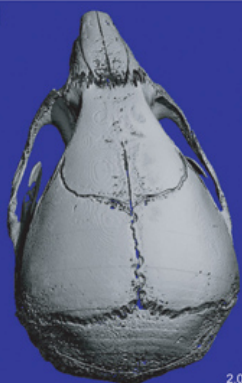

2.0 mm

**J**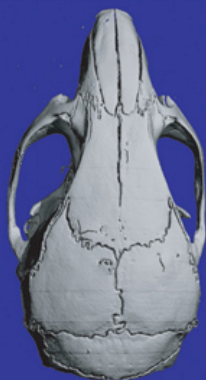

2.0 mm

**K**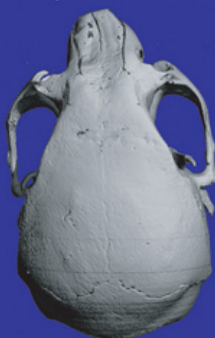

2.0 mm

**L**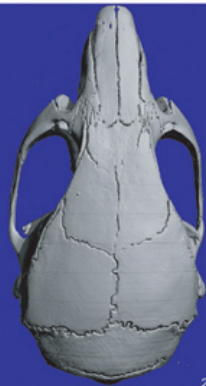

2.0 mm

Supplement: pnas_0609157103_2.pdf [file pnas_0609157103_2.pdf]

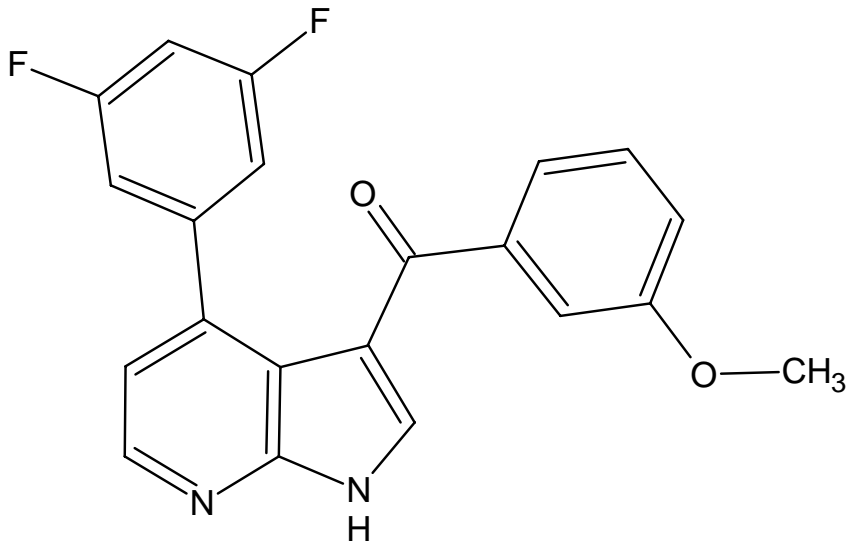

Supplement: pnas_0609157103_3.pdf [file pnas_0609157103_3.pdf]

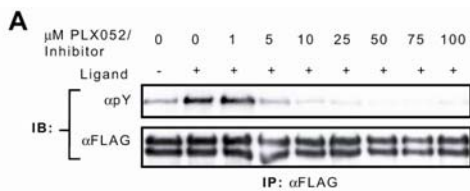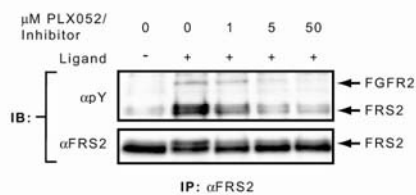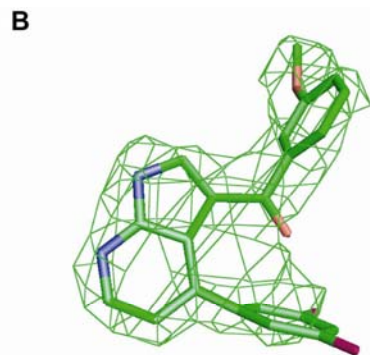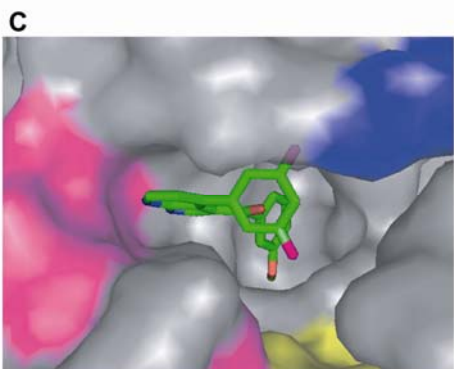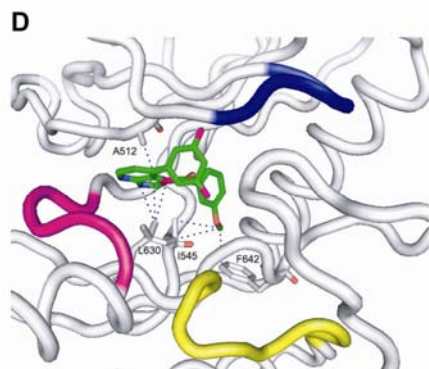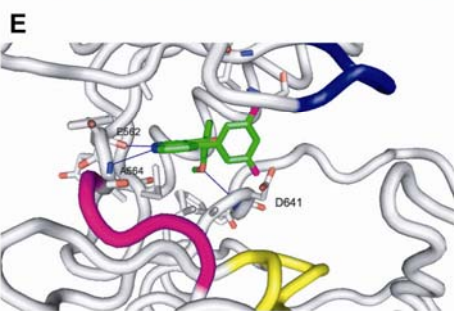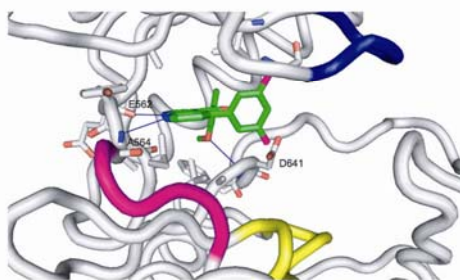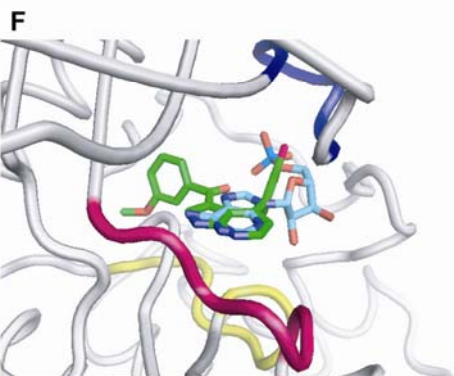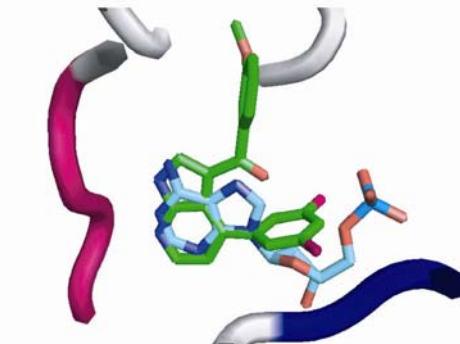

Supplement: pnas_0609157103_4.pdf [file pnas_0609157103_4.pdf]

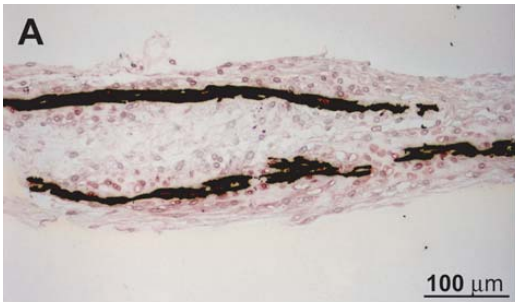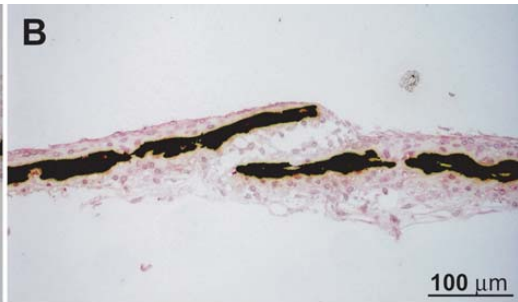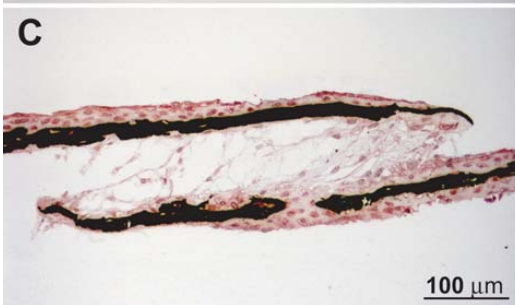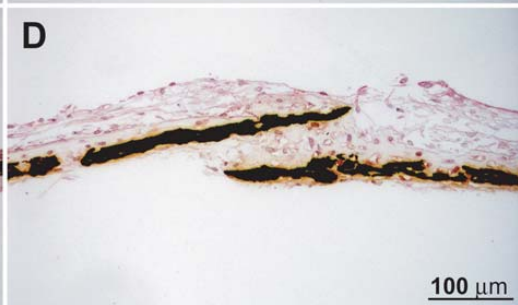

Supplement: pnas_0609157103_5.pdf [file pnas_0609157103_5.pdf]
